# Supplementary material
Source: Springer Nature journal article supplement (https://www.springermedizin.de/resource/supplementary/12931_2014_1481_MOESM1_ESM.pdf/9426294)

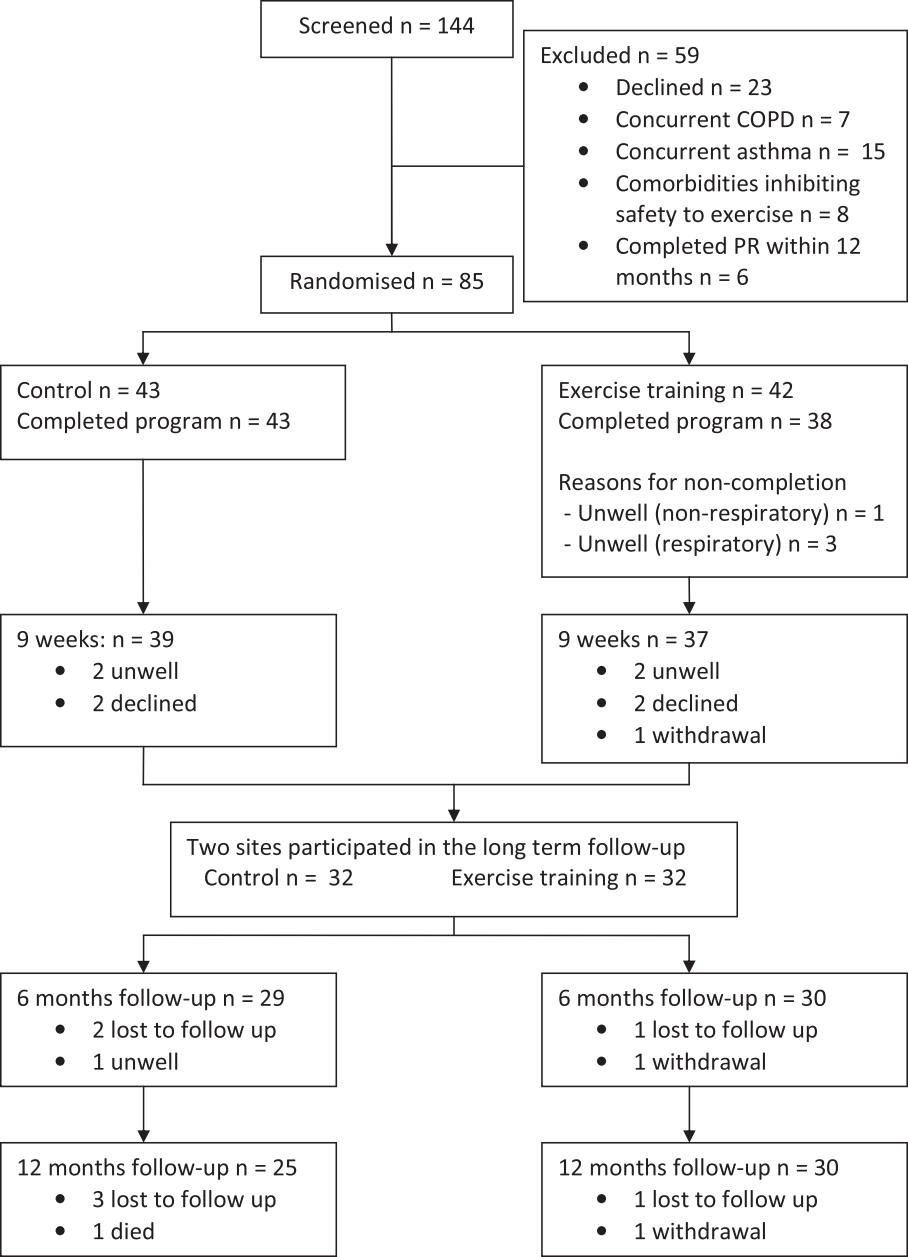

Supplement: MOESM1 [file 9426294]
